# Supplementary material
Source: publisher site journal article supplement (https://mbmg.pensoft.net/article/download/suppl/3916249/)
Supplement: Supplementary file 1

**Supplementary Table 1.** Family level taxa (BOLD Data) (‘*’ indicates that the column contains no taxa):

| Merino Only | Dorper Only | Goat Only | Dorper and Merino | Merino and Goat* | Dorper and Goat | Dorper, Merino and Goat |
| --- | --- | --- | --- | --- | --- | --- |
| Solanaceae | Boraginaceae | Casuarinaceae | Aizoaceae |  | Geraniaceae | Amaranthaceae |
|  | Plumbaginaceae |  |  |  | Goodeniaceae | Asteraceae |
|  |  |  |  |  | Marsileaceae | Brassicaceae |
|  |  |  |  |  |  | Convolvulaceae |
|  |  |  |  |  |  | Fabaceae |
|  |  |  |  |  |  | Myrtaceae |
|  |  |  |  |  |  | Poaceae |
